# Supplementary material
Source: publisher figshare collection journal article supplement (https://karger.figshare.com/articles/dataset/_/6226742)
Supplement: Supplementary file 1 [file 1]

**Table 1. Statistical results of the neuroplasticity- and ANLS-related proteins in the hippocampi of young, middle-aged, and old mice underwent moderate-intensity treadmill running training.**

| Neuroplasticity | Interaction | Age         | Exercise    |
|-----------------|-------------|-------------|-------------|
| BDNF            | n.s.        | n.s.        | $p < 0.01$  |
| FL-TrkB         | n.s.        | $p < 0.05$  | $p < 0.001$ |
| Syt-1           | n.s.        | n.s.        | n.s.        |
| Syt-4           | n.s.        | n.s.        | $p < 0.01$  |
| SNAp-25         | n.s.        | n.s.        | n.s.        |
| PSD-95          | n.s.        | n.s.        | n.s.        |
| ANLS            | Interaction | Age         | Exercise    |
| GLAST           | n.s.        | n.s.        | n.s.        |
| GLT-1           | n.s.        | n.s.        | n.s.        |
| GS              | n.s.        | $p < 0.001$ | $p < 0.01$  |
| Connexin-30     | n.s.        | $p < 0.001$ | n.s.        |
| Connexin-43     | n.s.        | $p < 0.001$ | n.s.        |
| PFK-1           | n.s.        | n.s.        | n.s.        |
| PFKFB-3         | n.s.        | n.s.        | n.s.        |
| MCT-1           | n.s.        | n.s.        | n.s.        |
| MCT-2           | n.s.        | n.s.        | $p < 0.05$  |
| MCT-4           | n.s.        | $p < 0.05$  | $p < 0.05$  |
