# Supplementary material
Source: publisher figshare collection journal article supplement (https://karger.figshare.com/articles/dataset/_/6226742)
Supplement: Supplementary file 3 [file 1]

## Figure Legends for Supplemental Figures

**Supplemental Figure 1: A six-week treadmill training upregulates the hippocampal expression of BDNF in Middle-aged mice and TrkB in Young and Middle-aged mice.** Left panels, representative micrographs of immunoblotting. Right panels, quantitative results of the relative expression of neuroplasticity-related proteins, on the upper left corner of figure,  $*p < 0.05$ ,  $**p < 0.01$ ,  $***p < 0.001$ , age or Ex effect, two-way ANOVA; above the bars,  $\#p < 0.05$ , versus respective SED in the same age group, Bonferroni's post hoc test. Exact sample sizes are labeled on each panel.

**Supplemental Figure 2: Aging and a six-week treadmill training alter the expression of ANLS-related proteins in the hippocampus.** Left panels, representative micrographs of immunoblotting. Right panels, quantitative results of the relative expression of ANLS-related proteins, on the upper left corner of figure,  $*p < 0.05$ ,  $**p < 0.01$ ,  $****p < 0.0001$ , age or Ex effect, two-way ANOVA; above the bars,  $*p < 0.05$ ,  $**p < 0.01$ ,  $***p < 0.001$  versus Young-SED;  $\#p < 0.05$ , versus respective SED in the same age group, Bonferroni's post hoc test. Exact sample sizes are labeled on each panel.
